# Supplementary material
Source: PubMed Central journal article supplement (PMC3198342)
Supplement: 1113035108_pnas.201113035SI.pdf [file 1113035108_pnas.201113035SI.pdf]

# Supporting Information

Inoue et al. 10.1073/pnas.1113035108

**A**

```

1          GAAAAGAGACTAGACTAGGAAGTCC 25
26  TGGTGCACTAGGGGTGCATTCACGCTCCCCCGGGCTGCACAGAGCAGGTGGAGGGCCC 85

86  ATGGCAAGCCTGGAGGGCAGCCAGGAGGAAGAACCTTGATGTCATGAGCACCCCTGGCC 145
    M A S L E G S Q E E E N L D V M S T L A
146 ACGTCTGGGATAAATGAGTCTGAGAAGTGGGGGTGCTCACCATGCCTCGGCTAGCTCG 205
    T S G I N E S E N W G V L T N A S A S S
206 GCCCCACACACCAAGGTCGATGCCTGGATGGTCCCTCTGCTTCTCGCTGCTC 265
    A P T Q P R S V D A W M V P L F F A V L
266 ATGCTGCTGGGTTTGTGGGAATTCGCTGTTATTTGGTTCATTTGCCGCATAAGCAG 325
    M L L G L M G N S L V I L V I C R H K Q
326 ATGCGCAGCTCACCATTTCACATCGCCAACCTAGCGGTACCAGCAGTCATGTTCCCT 385
    M R T V T N F Y I A N L A V T D V M F L
386 CTGTGCTGCTCCCTTCACCGCGGTGCTGACCCGCTTCCCGCTGGGTGCTGGGGCAC 445
    L C C V P F T A V L Y P L P A W V L G D
446 TTCATGTGCAAAATTCACAACTACATTCAGCAGGTCTCCGTACAGGTACATCGCCACC 505
    F M C K F I N Y I Q O V S V O A T C A T
506 CTGACTGCCATGAGCGTGGACCGCTGGTACGTGACCATCTTCCCCTGCGGGCCCTGCAC 565
    L T A M S V D R W Y V T I F P L R A L H
566 CGCGCAGCCCCCGCTGGCTCTATCCATCAGCCTCTGCATCTGGGCGGCTCGGCGGCC 625
    R R T P R L A L S I S L C I W A G S A A
626 CTGTCCGCGCTGTGCTGGCCTGCACCGCTGTCTCCGGGCCACGCACCTACTGCAGC 685
    L S A P V L G L H R V S P G P R T Y C S
686 GAGGCCTTCCCAGCGAGCTCTGGAGCGGGCTTCCCATCTACAACCTGCTGGCGCTT 745
    E A F P S R A L E R A F A I Y N L L A L
746 TACCTGCTGCCTCTGTCCGCTCCTGTGTCTGCTATGGGCCATGCTGCGCCACCTGGGG 805
    Y L L P L S A S C V C Y G A M L R H L G
806 CGCGCGCTGTGCGCCTGAGTCTGGAGACAGCGCTTGCAGGACAGCTCCTGGCTGAG 865
    R A A V R P E S G D S A L Q G Q L L A E
866 CGTGCCAGTCGGTGGCGCCAAAGTCTCCAGGCTGGTGGCAGCGTGGTGTCTGCTTT 925
    R A S A V R A K V S R L V A A V V L L F
926 GCCGTCTGTGGGCCCCGATCCAGCTGTTCTGATGCTGCAGGCGCTGGGCCCCGGGGC 985
    A V C W G P I O L F L M L O A L G P A G
986 TCCTGGCACCCAGCAGCTACGCGGCTATGCCCTCAAGACCTGGGCGCATTCATGATCC 1045
    S W H P R S Y A A Y A L K T W A H C M S
1046 TACAGCAACTCGGCGCTCAACCTCTGCTCTACGCCCTTCTGGGTGCCAACTTCCGTCGG 1105
    Y S N S A L N P L L Y A F L G A N F R R
1106 GCCCTGCGCAGTCTGCCCTTCCGCTCCCGCTCGTGGCGGCTCCCTCGGACCCCCCA 1165
    A L R R V C P C A P R R C R L P S D P P
1166 GAGTGCACCCGCTGGCGCCGCCAGCCCTTCTCTGGAGCCCGCTGTGTGTGCC 1225
    E L H R L A A R P A L S S G A R A V C A
1226 CAGGGAAGCGCTGAGCCTTCTGAGCCACTCCAGGAGGAAGGACATAATACGCT 1285
    Q G S G *
1286 TTCTAGAATAAGTCTCTCTCTCTCTTCTGGCTTCTGCCTATGATGCTTTAGTCT 1345
1346 GTCCAGATCCTCATGTCCTTTCTCTGCTCTCCCTCCTTCTCCAGGATGGTTCTG 1405
1406 CTCTTCTGATACTGGGTCTGGCTCTTCTGGAATGTTCTAGCGGTGGCACTAGCGGT 1465
1466 GGTGTAGCTTGCAGCCTGGTGTGATGATGATGATGATGATGATGATGATGATGATGAT 1525
1526 ACTATGAAAATGACCTTAGGGTGTCCACTCTGGAGAAGTCCGTGGGCGCTTGAA 1585
1586 TTGGTATCCCTCTCTTCTCACCCTCGCCTTTTTTAAGTGAATCTGATCAATAAA 1645
1646 AATAATCTTGCTTCAACACCCACAAAAAAAAAAAAAAAAAAAAAAAAAA 1696
  
```

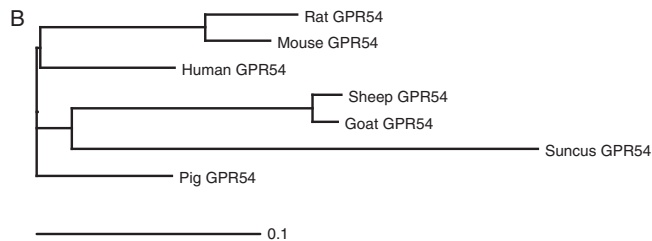

**Fig. S1.** Identification of suncus *Gpr54* gene. (A) Nucleotide and deduced amino acid sequences of the suncus G protein-coupled receptor 54 (*Gpr54*) gene. Transmembrane domains (TM1–7) are underlined. Two motifs, D/ERY/W and NPxxY, conserved in the rhodopsin-like guanine nucleotide-binding protein coupled receptor (GPCR) family, are indicated by closed circles. The asterisk indicates a stop codon. (B) A phylogenetic tree of amino acid sequences of GPR54 is available from each database. An unrooted tree was built using neighbor-joining based on alignment of GPR54 amino acid sequences. Scale indicates divergence time.
